# Supplementary material for: A Novel Method to Assess Antimicrobial Susceptibility in Commensal Oropharyngeal Neisseria—A Pilot Study
Source: MDPI journal article supplement (doi:10.3390/antibiotics11010100), 2022-01-13
Supplement: s1 [file s1]

Supplemental Table S1. Bacterial species isolated using MALDI-TOF-MS from paired oral rinse and oropharyngeal swab samples present on the azithromycin-containing plate (2 µg/mL) and the plate without azithromycin.

| Participant | Oral Rinse sample<br>on plate -AZM                                                | Oral Rinse sample<br>on plate +AZM                                                    | Swab sample<br>on plate -AZM                           | Swab sample<br>on plate +AZM                                                          |
|-------------|-----------------------------------------------------------------------------------|---------------------------------------------------------------------------------------|--------------------------------------------------------|---------------------------------------------------------------------------------------|
| 1           | <i>Neisseria subflava</i><br><i>Neisseria macacae</i>                             | <i>Neisseria subflava</i><br><i>Neisseria</i> spp. - Most likely<br><i>N. macacae</i> | <i>Neisseria subflava</i><br><i>Neisseria macacae</i>  | <i>Neisseria subflava</i><br><i>Neisseria</i> spp. - Most likely<br><i>N. macacae</i> |
| 2           | <i>Neisseria subflava</i><br><i>Neisseria macacae</i>                             | <i>Neisseria subflava</i><br><i>Neisseria bacilliformis</i>                           | <i>Neisseria subflava</i><br><i>Neisseria macacae</i>  |                                                                                       |
| 3           | <i>Neisseria subflava</i><br><i>Neisseria macacae</i>                             | <i>Neisseria subflava</i><br><i>Neisseria macacae</i>                                 | <i>Neisseria subflava</i><br><i>Neisseria macacae</i>  | <i>Neisseria subflava</i>                                                             |
| 4           | <i>Neisseria subflava</i><br><i>Neisseria macacae</i>                             | <i>Neisseria subflava</i><br><i>Neisseria macacae</i>                                 | <i>Neisseria subflava</i><br><i>Neisseria macacae</i>  | <i>Neisseria subflava</i><br><i>Neisseria</i> spp. - Most likely<br><i>N. macacae</i> |
| 5           | <i>Neisseria subflava</i><br><i>Neisseria elongata</i>                            | <i>Neisseria subflava</i>                                                             | <i>Neisseria subflava</i><br><i>Neisseria elongata</i> | <i>Neisseria subflava</i>                                                             |
| 6           | <i>Neisseria subflava</i><br><i>Neisseria macacae</i>                             | <i>Neisseria subflava</i><br><i>Neisseria</i> spp. - Most likely<br><i>N. macacae</i> | <i>Neisseria subflava</i><br><i>Neisseria macacae</i>  | <i>Neisseria subflava</i><br><i>Neisseria</i> spp. - Most likely<br><i>N. macacae</i> |
| 7           | <i>Neisseria subflava</i><br><i>Neisseria elongata</i><br><i>Moraxella</i> spp/   | <i>Neisseria subflava</i><br><i>Neisseria macacae</i>                                 | <i>Neisseria subflava</i><br><i>Neisseria macacae</i>  | <i>Neisseria subflava</i><br><i>Neisseria macacae</i>                                 |
| 8           | <i>Neisseria subflava</i>                                                         | <i>Neisseria subflava</i>                                                             |                                                        | <i>Neisseria subflava</i>                                                             |
| 9           | <i>Neisseria subflava</i>                                                         | <i>Neisseria subflava</i>                                                             | <i>Neisseria subflava</i>                              | <i>Neisseria subflava</i>                                                             |
| 10          | <i>Neisseria subflava</i><br><i>Neisseria oralis</i><br><i>Brevundimonas</i> spp. | <i>Neisseria subflava</i><br><i>Brevundimonas</i> spp.                                | <i>Neisseria subflava</i><br><i>Brevundimonas</i> spp. | <i>Neisseria subflava</i>                                                             |

AZM= azithromycin, spp.=species, *Neisseria macacae*= *Neisseria macacae* and *Neisseria mucosa*, *Neisseria subflava*= *Neisseria subflava*/*Neisseria flavescens*/*Neisseria perflava*

Supplemental Table S2. Absolute number of colonies counted from diluted oral rinse and swab samples on the LBVT-SNR plates with and without azithromycin.

| Participant | Condition        | Dilution 10 <sup>-1</sup> | Dilution 10 <sup>-2</sup> | Dilution 10 <sup>-3</sup> |
|-------------|------------------|---------------------------|---------------------------|---------------------------|
| 1           | Swab             | 138                       | 46                        | <20                       |
|             | Swab + AZM       | 96                        | <20                       | <20                       |
|             | Oral rinse       | >200                      | 205                       | <20                       |
|             | Oral rinse + AZM | >200                      | 95                        | <20                       |
| 2           | Swab             | <20                       | <20                       | <20                       |
|             | Swab + AZM       | <20                       | <20                       | <20                       |
|             | Oral rinse       | >200                      | 68                        | <20                       |
|             | Oral rinse + AZM | 48                        | <20                       | <20                       |
| 3           | Swab             | 128                       | <20                       | <20                       |
|             | Swab + AZM       | 26                        | <20                       | <20                       |
|             | Oral rinse       | >200                      | >200                      | 164                       |
|             | Oral rinse + AZM | >200                      | >200                      | 82                        |
| 4           | Swab             | >200                      | >200                      | 40                        |
|             | Swab + AZM       | >200                      | >200                      | 75                        |
|             | Oral rinse       | >200                      | >200                      | 87                        |
|             | Oral rinse + AZM | >200                      | >200                      | 69                        |
| 5           | Swab             | >200                      | >200                      | 149                       |
|             | Swab + AZM       | >200                      | >200                      | 34                        |
|             | Oral rinse       | >200                      | 60                        | <20                       |
|             | Oral rinse + AZM | >200                      | 66                        | <20                       |
| 6           | Swab             | >200                      | >200                      | 154                       |
|             | Swab + AZM       | >200                      | >200                      | 36                        |
|             | Oral rinse       | >200                      | >200                      | 145                       |
|             | Oral rinse + AZM | >200                      | >200                      | 156                       |
| 7           | Swab             | >200                      | >200                      | 50                        |
|             | Swab + AZM       | >200                      | >200                      | 35                        |
|             | Oral rinse       | >200                      | >200                      | 62                        |
|             | Oral rinse + AZM | >200                      | >200                      | 37                        |
| 8           | Swab             | <20                       | <20                       | <20                       |
|             | Swab + AZM       | <20                       | <20                       | <20                       |
|             | Oral rinse       | >200                      | 109                       | <20                       |
|             | Oral rinse + AZM | >200                      | 38                        | <20                       |
| 9           | Swab             | >200                      | 61                        | <20                       |
|             | Swab + AZM       | >200                      | 36                        | <20                       |
|             | Oral rinse       | >200                      | 169                       | <20                       |
|             | Oral rinse + AZM | >200                      | 116                       | <20                       |
| 10          | Swab             | >200                      | >200                      | 29                        |
|             | Swab + AZM       | >200                      | >200                      | 22                        |
|             | Oral rinse       | >200                      | >200 (376)                | *                         |
|             | Oral rinse + AZM | >200                      | >200 (408)                | 65                        |

AZM= azithromycin, \*= Culture not evenly distributed, uncountable
